# Supplementary material
Source: publisher figshare collection journal article supplement (https://tandf.figshare.com/ndownloader/files/17496524)
Supplement: Supplementary file 1 [file 17496524]

**Immobilization of unmodified aminoanthraquinone derivatives onto silica gel surface for solid phase extraction and preconcentration of Pb(II)**

Yuwapon Uppa,*† Thianthan Taweetanavanich,** Chatthai Kaewtong,** † and Noi Niamsa**

**Department of Chemistry, Faculty of Engineering, Rajamangala University of Technology Isan KhonKaen Campus, Khonkaen 40000, Thailand.*

***Nanotechnology Research Unit and Supramolecular Chemistry Research Unit, Department of Chemistry and Center of Excellence for Innovation in Chemistry, Faculty of Science, Mahasarakham University, Mahasarakham, 44150, Thailand*

† To whom correspondence should be addressed.

E-mail: [kchatthai@gmail.com](mailto:kchatthai@gmail.com), yuwapon.uppa@gmail.com

|  | **Contents** |  |  |
| --- | --- | --- | --- |
|  |  |  |  |
|  | **Figure S1.** FTIR spectrum of **SL1.** | S3 |  |
|  | **Figure S2.** FTIR spectrum of **SL2.** | S3 |  |
|  | **Figure S3.** FTIR spectrum of **SL3.** | S4 |  |


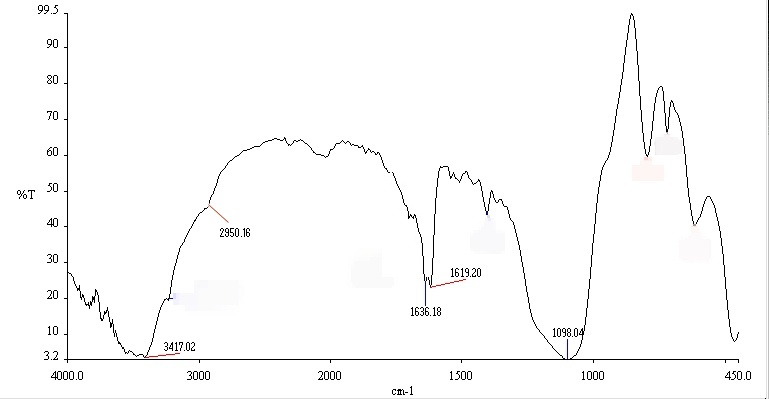


**Figure S1.** FTIR spectrum of **SL1**.


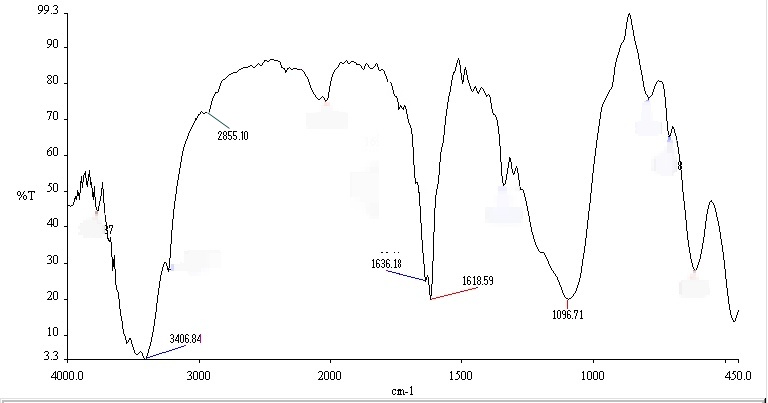


**Figure S2.** FTIR spectrum of **SL2**.


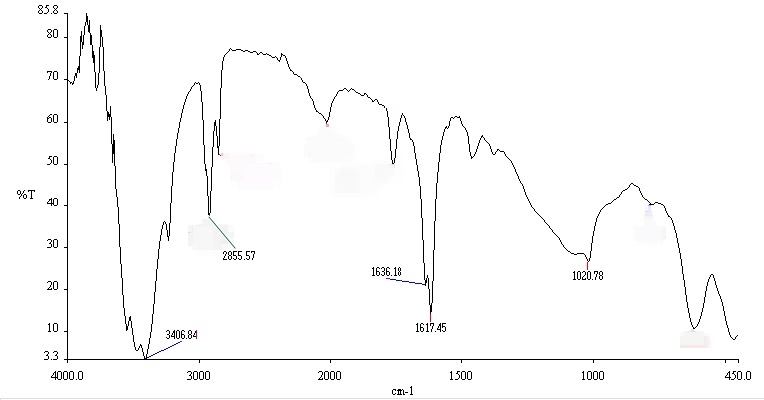


**Figure S3.** FTIR spectrum of **SL3**.
